# Supplementary material for: A Novel Approach to Assessing Nuisance Risk from Seismicity Induced by UK Shale Gas Development, with Implications for Future Policy Design
Source: Copernicus journal article supplement (doi:10.5194/nhess-2020-95), 2020-05-07
Supplement: Supplementary file [file nhess-2020-95-AC2-supplement.pdf]

# **Response to comments for "A Novel Approach to Assessing Nuisance Risk from Seismicity Induced by UK Shale Gas Development, with Implications for Future Policy Design", by Gemma Cremen and Maximilian J. Werner**

**NHESS-2020-95**

We thank the reviewer for their thoughtful comments, which have improved the quality of the revised manuscript. The reviewer's comments have been numbered and listed below, followed by our responses in italics.

## **Reviewer 2:**

1. Section 3: I suggest to provide further information about induced seismicity in the shale gas site in Lancashire, including some references.

*We have added several additional references at the start of Section 3:*

1. Cremen, G., Werner, M. J., and Baptie, B.: Understanding induced seismicity hazard related to shale gas exploration in the UK, in: SECED 2019 Conference: Earthquake Risk and Engineering towards a Resilient World, 2019a
2. Baptie, B.: Earthquake Seismology 2018/2019, British Geological Survey Open Report OR/19/039, 2019
3. Clarke, H., Verdon, J. P., Kettlety, T., Baird, A., and Kendall, J.-M.: Real-time imaging, forecasting, and management of human-induced seismicity at Preston New Road, Lancashire, England, Seismological Research Letters, 90, 1902–1915, 2019
4. Kettlety, T., Verdon, J., Werner, M., and Kendall, J.: Stress transfer from opening hydraulic fractures controls the distribution of induced seismicity, Journal of Geophysical Research: Solid Earth, 125, e2019JB018 794, 2020
5. Mair, R., Bickle, M., Goodman, D., Koppelman, B., Roberts, J., Selley, R., Shipton, Z., Thomas, H., Walker, A., Woods, E., et al.: Shale gas extraction in the UK: a review of hydraulic fracturing, Royal Society and Royal Academy of Engineering, 2012.

*In addition, we have provided further description on the magnitudes of the events (which was already provided in the Introduction) and we have included some background information on induced seismicity in the UK, for context. The first paragraph of Section 3 now reads:*

*We apply the proposed framework to the region surrounding the Preston New Road (PNR) shale gas site in Lancashire, North West England, where hydraulic fracturing operations in late 2018 (at PNR-1z well) and mid 2019 (at PNR-2 well) resulted in 29  $M_L > 0$  events with maximum magnitude  $M_L = 2.9$ , eight of which were felt nearby (e.g., Baptie, 2019; Cremen et al., 2019a, b; Clarke et al., 2019; Kettlety et al., 2020). Shale gas development is a relatively new source of induced seismicity in the UK (Clarke et al., 2014), and the PNR activities are the only hydraulic fracturing operations to take place onshore in the country between a 2012 government-ordered investigation into the related risks (Mair et al., 2012) and the hydraulic fracturing moratorium imposed in England in November 2019. For the purposes of this application, we assume that seismicity is produced from a point source 2 km deep (i.e.  $n_s = 1$  in equation 1), at a respective*

*latitude and longitude of 53.7873° North and 2.9511° West. This location corresponds to the approximate depth of the Bowland shale targeted by the operation and the surface coordinates of the PNR-1z well, according to the 2018 hydraulic fracture plan of the operator (Cuadrilla, 2017)*

2. It would be interesting to include in the proposed risk modelling (or discuss at least the inclusion in a future work) the local seismic response and the soil-building resonance effects (e.g., see Gueguen et al., 2002, doi:10.1785/0120000306; Petrovic et al., 2016, doi: 10.1785/0120150326; Gallipoli et al., 2020, doi: 10.1016/j.enggeo.2020.105645), because they may significantly affect the derived ground motion values of your model.

*Thank you for this suggestion. While we appreciate that soil-structure interaction can modify structural performance (either favourably or unfavourably), it is recognised that the consideration of soil-structure interaction in large-scale risk analyses (such as this study, which includes > 4000 buildings) can be a challenging and time-consuming process (Silva et al., 2020). An alternative proxy method of accounting for these effects is the consideration of secondary factors (e.g., age) that aggravate or attenuate the seismic vulnerability (Silva et al., 2020). We have already implicitly accounted for these factors in our analysis by considering both “worst case” (i.e. weak structure) and “best case” (i.e. strong structure) scenarios for cosmetic damage.*

Silva, V., Akkar, S., Baker, J., Bazzurro, P., Castro, J. M., Crowley, H., Dolsek, M., Galasso, C., Lagomarsino, S., Monteiro, R., et al.: Current challenges and future trends in analytical fragility and vulnerability modeling, *Earthquake Spectra*, 35, 1927–1952, 2019.

3. Please order multiple citations according to the time of publication. As an example, at page 5, line 121, you should substitute (Ader et al., 2019; Walters et al., 2015) with (Walters et al., 2015; Ader et al., 2019); make the same operation at page 1 (line 15 and line 18), page 6 (line 128), and so on.

*We have implemented this suggestion in the updated version of the paper.*
